# Supplementary material for: Simultaneous detection of pathogens and antimicrobial resistance genes with the open source, cloud-based, CZ ID pipeline
Source: PubMed Central journal article supplement — bioRxiv. 2024 Apr 18:2024.04.12.589250. Preprint. [Version 2] doi: 10.1101/2024.04.12.589250 (PMC11030322; doi:10.1101/2024.04.12.589250), 2024-04-18
Supplement: NIHPP2024.04.12.589250v2-supplement-1.pdf [file NIHPP2024.04.12.589250v2-supplement-1.pdf]

571 **Supplementary Materials**

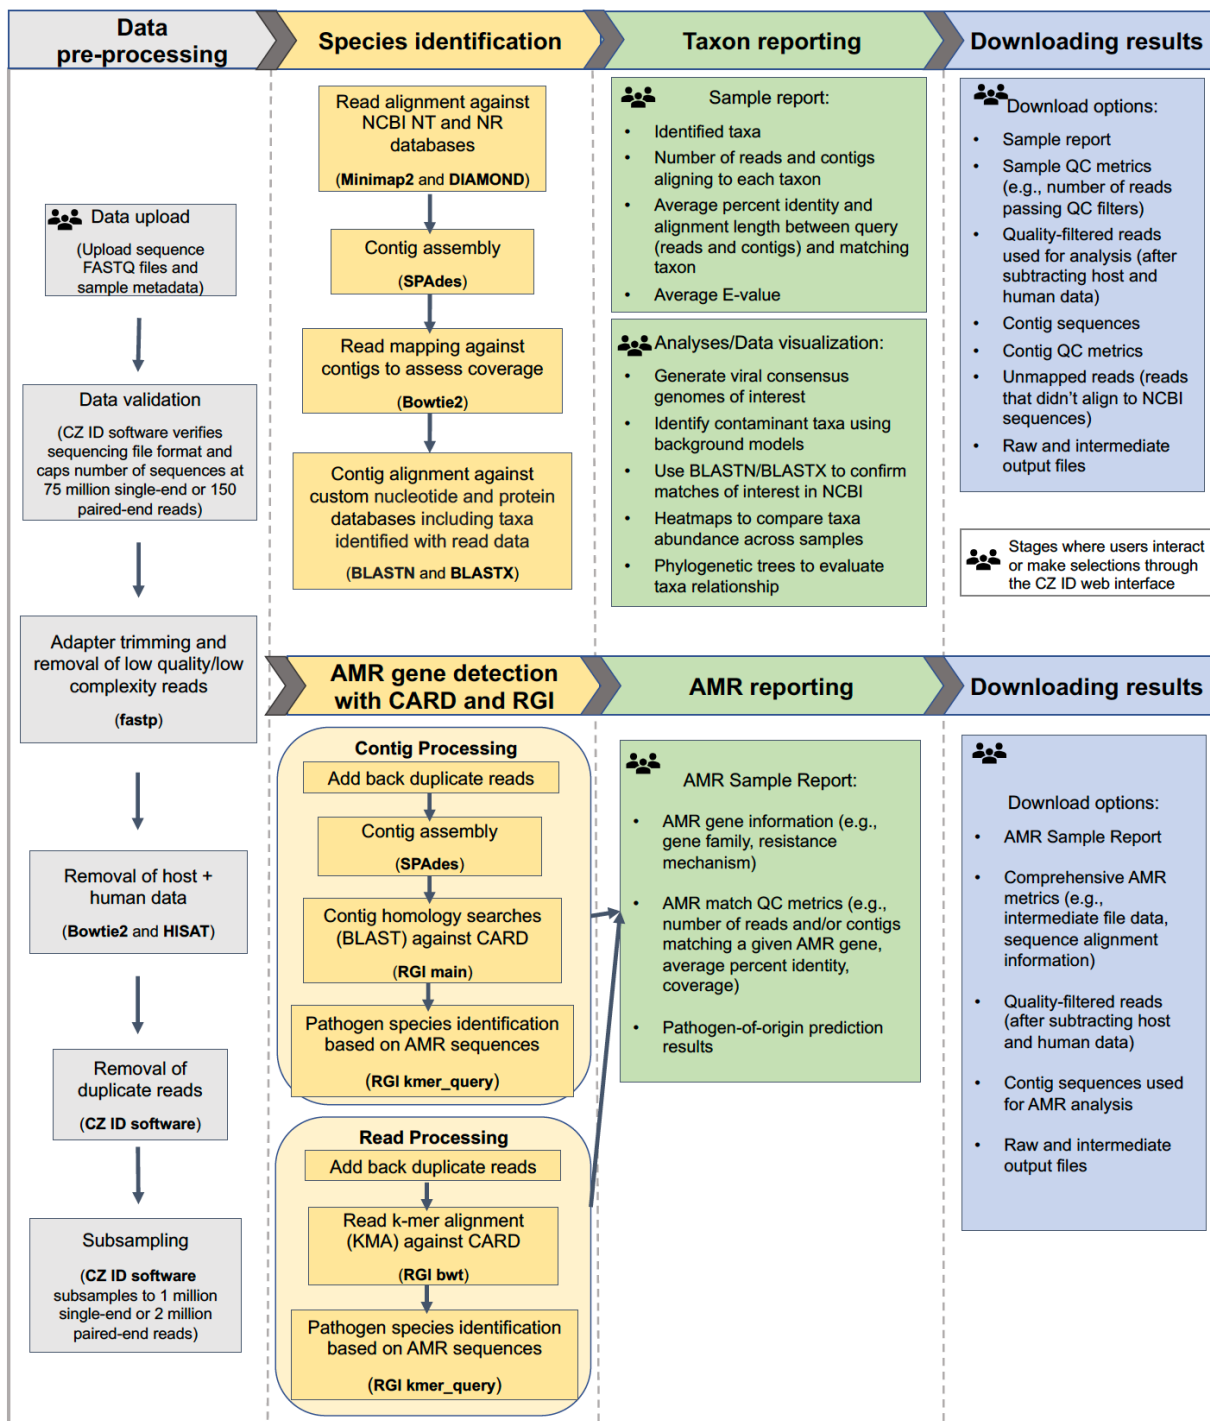

572

573 **Figure S1. Detailed flow diagram highlighting the integrated AMR and mNGS modules**  
 574 **within the CZ ID pipeline.**

575
